# Supplementary material for: Unusual N-oxide formation in the peroxidation of cobalt(ii) ethylenediaminetetraacetates
Source: Royal Society of Chemistry journal article supplement (doi:10.1039/c6dt04346a), 2016-12-12
Supplement: c6dt04346a1.pdf [file c6dt04346a1.pdf]

## Supporting Information

### Unusual N-oxido formation in the peroxidation of cobalt(II) ethylenediaminetetraacetates

Yu-Chen Yang,<sup>a,b</sup> Rui Wu,<sup>b</sup> Yan Cai<sup>b</sup> and Zhao-Hui Zhou<sup>\*b</sup>

<sup>a</sup>*Shaanxi Key Laboratory of Natural Products & Chemical Biology, College of Science, Northwest A&F University, Yangling 712100, People's Republic of China.*

<sup>b</sup>*State Key Laboratory of Physical Chemistry of Solid Surfaces, College of Chemistry and Chemical Engineering, Xiamen University, Xiamen, 361005, People's Republic of China. E-mail: zhzhou@xmu.edu.cn; Tel: +86 592 2184531; Fax: +86 592 2183047.*

Figure S1. ORTEP plot of the anion structure for  $\text{K}[\text{Co}(\text{edta})]\cdot 2\text{H}_2\text{O}$  (**4**) at the 30% probability levels.

Figure S2. ORTEP plot of the anion structure for  $\text{Na}_{2n}[\text{Co}(\text{edta})]_n\cdot 4n\text{H}_2\text{O}$  (**5**) at the 30% probability levels.

Figure S3. IR spectra for  $\text{K}_4[\text{Co}_2(\text{edtaO}_2)_2]\cdot 6.5\text{H}_2\text{O}$  (**1**),  $\text{K}_4[\text{Co}_2(\text{edtaO}_2)_2]\cdot 10\text{H}_2\text{O}$  (**2**),  $[\text{Co}_2(\text{edtaO}_2)(\text{H}_2\text{O})_6]_n\cdot 2n\text{H}_2\text{O}$  (**3**),  $\text{K}[\text{Co}(\text{edta})]\cdot 2\text{H}_2\text{O}$  (**4**) and  $\text{Na}_{2n}[\text{Co}(\text{edta})]_n\cdot 4n\text{H}_2\text{O}$  (**5**).

Figure S4. UV-Vis solution spectra for  $\text{K}_4[\text{Co}_2(\text{edtaO}_2)_2]\cdot 6.5\text{H}_2\text{O}$  (**1**),  $\text{K}_4[\text{Co}_2(\text{edtaO}_2)_2]\cdot 10\text{H}_2\text{O}$  (**2**),  $\text{K}[\text{Co}(\text{edta})]\cdot 2\text{H}_2\text{O}$  (**4**) and  $\text{Na}_{2n}[\text{Co}(\text{edta})]_n\cdot 4n\text{H}_2\text{O}$  (**5**).

Table S1 Bond valence sum calculations for cobalt complexes **1** ~ **5**.

Table S2 Selected bond distances for  $\text{K}_4[\text{Co}_2(\text{edtaO}_2)_2]\cdot n\text{H}_2\text{O}$  [ $n = 6.5$  (**1**), 10 (**2**)],  $[\text{Co}_2(\text{edtaO}_2)(\text{H}_2\text{O})_6]_n\cdot 2n\text{H}_2\text{O}$  (**3**),  $\text{K}[\text{Co}(\text{edta})]\cdot 2\text{H}_2\text{O}$  (**4**) and  $\text{Na}_{2n}[\text{Co}(\text{edta})]_n\cdot 4n\text{H}_2\text{O}$  (**5**).

Table S3. Selected bond distances and angles within the water clusters in  $\text{K}_4[\text{Co}_2(\text{edtaO}_2)_2]\cdot 10\text{H}_2\text{O}$  (**2**).

Table S4. <sup>13</sup>C NMR spectral data (in ppm) for  $\text{K}[\text{Co}(\text{edta})]\cdot 2\text{H}_2\text{O}$  (**4**) and  $\text{K}_4\text{EDTA}$ .



Figure S2

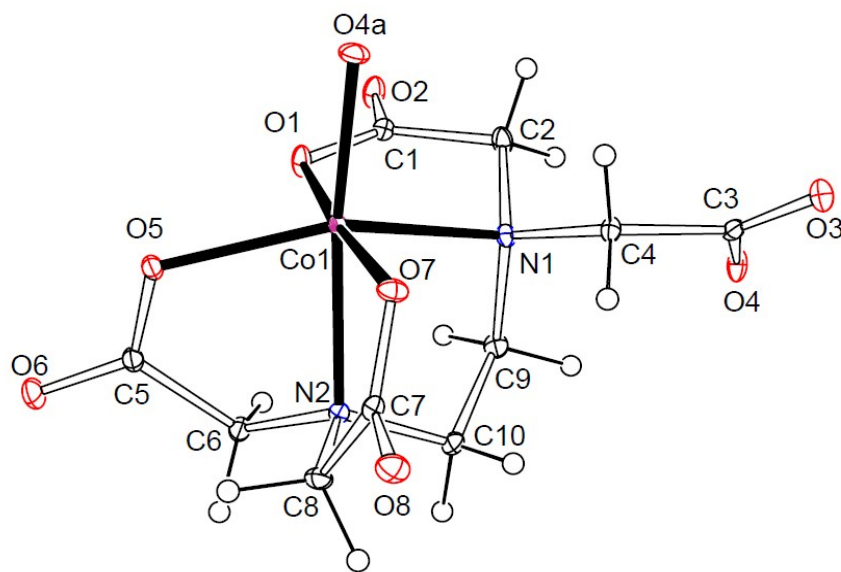

Figure S3

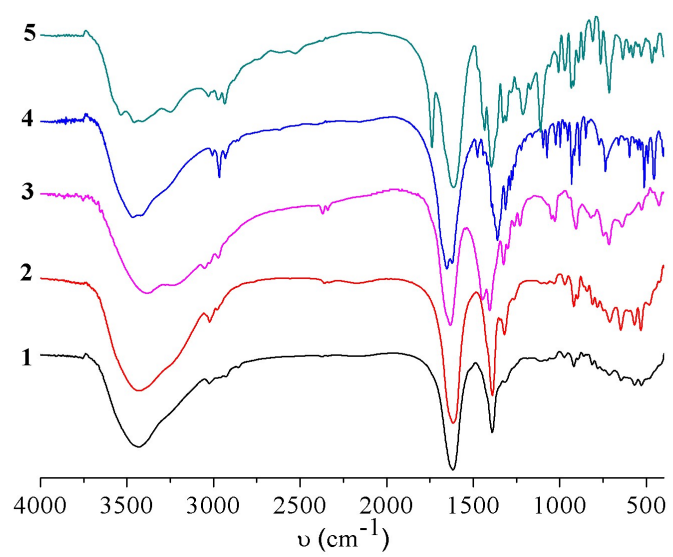

Figure S4

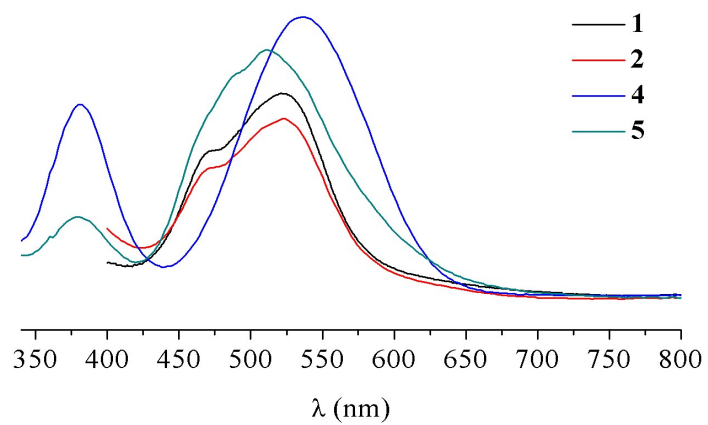

Table S1 Bond valence sum calculations for cobalt complexes **1** ~ **5**.

| Co <sup>n+</sup> | Complexes                                                                                                            | Co1   | Co2   |
|------------------|----------------------------------------------------------------------------------------------------------------------|-------|-------|
| +2               | K <sub>4</sub> [Co <sub>2</sub> (edtaO <sub>2</sub> ) <sub>2</sub> ]·6.5H <sub>2</sub> O ( <b>1</b> )                | 2.091 | 2.122 |
| +2               | K <sub>4</sub> [Co <sub>2</sub> (edtaO <sub>2</sub> ) <sub>2</sub> ]·10H <sub>2</sub> O ( <b>2</b> )                 | 2.179 | 2.112 |
| +2               | [Co <sub>2</sub> (edtaO <sub>2</sub> )(H <sub>2</sub> O) <sub>6</sub> ] <sub>n</sub> ·2nH <sub>2</sub> O( <b>3</b> ) | 2.146 |       |
| +3               | K[Co(edta)]·2H <sub>2</sub> O ( <b>4</b> )                                                                           | 3.778 |       |
| +2               | Na <sub>2n</sub> [Co(edta)] <sub>n</sub> ·4nH <sub>2</sub> O ( <b>5</b> )                                            | 2.153 |       |

Table S2. Selected bond distances for  $K_4[Co_2(edtaO_2)_2] \cdot nH_2O$  [ $n = 6.5$  (**1**),  $10$  (**2**)],  $[Co_2(edtaO_2)(H_2O)_6]_n \cdot 2nH_2O$  (**3**) and  $\{Na_2[Co(edta)]\}_n \cdot 4nH_2O$  (**5**)

| Bonds       | <b>1</b> | <b>2</b> | Bonds       | <b>3</b> | Bonds      | <b>5</b> |
|-------------|----------|----------|-------------|----------|------------|----------|
| Co(1)–O(1)  | 2.087(2) | 2.097(3) | Co(1)–O(1)  | 2.078(1) | Co(1)–O(1) | 2.140(2) |
| Co(1)–O(5)  | 2.144(2) | 2.127(3) | Co(1)–O(3a) | 2.111(1) | Co(1)–O(4) | 2.033(2) |
| Co(1)–O(9)  | 2.040(2) | 2.010(2) | Co(1)–O(5)  | 2.033(1) | Co(1)–O(5) | 2.107(2) |
| Co(1)–O(10) | 2.052(2) | 2.070(2) | Co(1)–O(1w) | 2.160(2) | Co(1)–O(7) | 2.084(2) |
| Co(1)–O(11) | 2.047(2) | 2.107(2) | Co(1)–O(2w) | 2.091(1) | Co(1)–N(1) | 2.217(2) |
| Co(1)–O(19) | 2.136(2) | 2.070(2) | Co(1)–O(3w) | 2.059(1) | Co(1)–N(2) | 2.156(2) |
| Co(2)–O(7)  | 2.068(2) | 2.081(2) |             |          |            |          |
| Co(2)–O(10) | 2.090(2) | 2.056(2) |             |          |            |          |
| Co(2)–O(13) | 2.132(2) | 2.138(3) |             |          |            |          |
| Co(2)–O(17) | 2.128(2) | 2.088(3) |             |          |            |          |
| Co(2)–O(19) | 2.065(2) | 2.067(2) |             |          |            |          |
| Co(2)–O(20) | 1.994(2) | 1.987(2) |             |          |            |          |

Symmetry transformations: (a)  $x - 1, y, z$ .

Table S3. Selected bond distances and angles within the water clusters in  $K_4[Co_2(edtaO_2)_2] \cdot 10H_2O(2)$ .

| D-H...A       | D-H (Å) | H...A(Å) | D...A(Å) | D-H...A(°) |
|---------------|---------|----------|----------|------------|
| O1w-H...O3w   | 0.85(3) | 1.97(3)  | 2.802(4) | 168(3)     |
| O1w-H...O5wa  | 0.84(2) | 1.99(2)  | 2.823(5) | 167(4)     |
| O3w-H...O10wb | 0.85(3) | 1.96(3)  | 2.789(5) | 167(3)     |
| O4w-H...O7wc  | 0.84(2) | 2.10(1)  | 2.925(5) | 167(4)     |
| O5w-H...O4wa  | 0.85(2) | 1.90(3)  | 2.719(5) | 161(4)     |
| O6w-H...O1wd  | 0.85(3) | 2.07(3)  | 2.922(5) | 177(2)     |
| O8w-H...O9we  | 0.85(3) | 1.98(3)  | 2.825(5) | 174(3)     |
| O9w-H...O7w   | 0.85(4) | 2.20(4)  | 2.902(5) | 140(3)     |
| O10w-H...O1wc | 0.85(3) | 1.98(3)  | 2.794(5) | 159(3)     |

Symmetry transformations: (a)  $-x + 1, -y + 1, -z$ ; (b)  $x, y + 1, z$ ; (c)  $-x, -y, -z$ ; (d)  $x + 1, y, z$ ; (e)  $-x + 1, -y + 1, -z + 1$ .



Table S4.  $^{13}\text{C}$  NMR spectral data (in ppm) for  $\text{K}[\text{Co}(\text{edta})]\cdot 2\text{H}_2\text{O}$  (**4**) and  $\text{K}_4\text{EDTA}$ .

| Compounds            | $-\text{CH}_2\text{N}$ | $-\text{NCH}_2\text{CO}_2$ | $-\text{CO}_2$         |
|----------------------|------------------------|----------------------------|------------------------|
| <b>4</b>             | 66.1(12.4)             | 67.9(7.8), 68.1(8.0)       | 184.4(5.9), 185.1(6.6) |
| $[\text{EDTA}]^{4-}$ | 53.7                   | 60.1                       | 178.5                  |
